# Supplementary material for: Roles of pH, ionic strength, and sulfate in the aqueous nitrate-mediated photooxidation of green leaf volatiles
Source: Copernicus journal article supplement (doi:10.5194/egusphere-2025-570), 2025-03-04
Supplement: Supplementary file 1 [file egusphere-2025-570-supplement.pdf]

Supplemental information for

**Roles of pH, ionic strength and sulfate in the aqueous nitrate-mediated photooxidation of green leaf volatiles**

Yuting Lyu<sup>a,b</sup>, Taekyu Joo<sup>c</sup>, Ruihan Ma<sup>a</sup>, Mark Kristan Espejo Cabello<sup>a,b</sup>, Tianye Zhou<sup>a</sup>, Shun Yeung<sup>a</sup>, Cheuk Ki Wong<sup>a</sup>, Yifang Gu<sup>a</sup>, Yiming Qin<sup>a</sup>, Theodora Nah<sup>a,b\*</sup>

<sup>a</sup>*School of Energy and Environment, City University of Hong Kong, Hong Kong SAR, China*

<sup>b</sup>*State Key Laboratory of Marine Pollution, City University of Hong Kong, Hong Kong SAR, China*

<sup>c</sup>*Department of Earth and Environmental Sciences, Korea University, Seoul, South Korea*

\* Correspondence: Theodora Nah ([theodora.nah@cityu.edu.hk](mailto:theodora.nah@cityu.edu.hk), Tel: +852 3442 5578, Postal address: School of Energy and Environment, Yeung Kin Man Academic Building, City University of Hong Kong, Tat Chee Avenue, Kowloon, Hong Kong)

## S1. Measurement of p-hydroxybenzoic acid

p-hydroxybenzoic acid, which is formed from the reaction of  $\cdot\text{OH}$  with BA ( $k_{\text{BA}+\text{OH}} = 5.9 \times 10^9 \text{ M}^{-1} \text{ s}^{-1}$  (Herrmann et al., 2010)) at a yield of 0.17 (Anastasio and McGregor, 2001), was measured in separate experiments using an ultra-high performance liquid chromatography system (1290 system, Agilent) coupled to a high-resolution quadrupole-time-of-flight mass spectrometer (X500R QTOF MS/MS, Sciex) (UPLC-MS) equipped with an electrospray ionization (ESI) source that was operated in negative mode. A reverse phase Kinetex (Phenomenex) Polar C18 column (2.6  $\mu\text{m}$ ,  $150 \times 2.1 \text{ mm}$ ) equipped with a Polar C18 guard column was used for UPLC-MS analysis. The temperatures for the column oven and the UPLC autosampler were set to 25  $^{\circ}\text{C}$ . A gradient elution program was used. For the mobile phase, eluent A was 10 mM ammonia acetate in Milli-Q water buffered with 0.03% acetic acid, and eluent B was pure methanol. A gradient elution program was used, and it was delivered at a flow rate of 0.3  $\text{mL min}^{-1}$ . The following mobile phase gradient was used for the detection of BA and its product PHBA: 0 to 3 min 1% B, 3 to 5 min linear rise to 80% B and hold to 6 min, 6 to 6.5 min linear drop to 1% B and then hold to 10 min for equilibrium. The sample injection volume was set to 10  $\mu\text{L}$ . The following tandem MS conditions were used: -4500 V ESI ion spray voltage, 80 V declustering potential, -20 V collision energy, 50 psi ion source gas, 25 psi curtain gas, and 450  $^{\circ}\text{C}$  source temperature. Solid phase extraction (SPE) was performed to desalt the samples using SPE cartridges (Oasis MAX, 60 mg, 3 cc, 60  $\mu\text{m}$ , Waters). First, the sorbent was conditioned and equilibrated using 3 mL of methanol (LC-MS grade) followed by 3 mL of Milli-Q water. Next, the cartridge was loaded with 3 mL of 1 $\times$  diluted sample solution and then purged with 6 mL of Milli-Q water. A vacuum pump was used to dry out the sorbent before elution using 3 mL of 2% formic acid in methanol. All the desalted samples were filtered using 0.2  $\mu\text{m}$  nylon syringe filters to remove any particulates prior to UPLC-MS analysis.

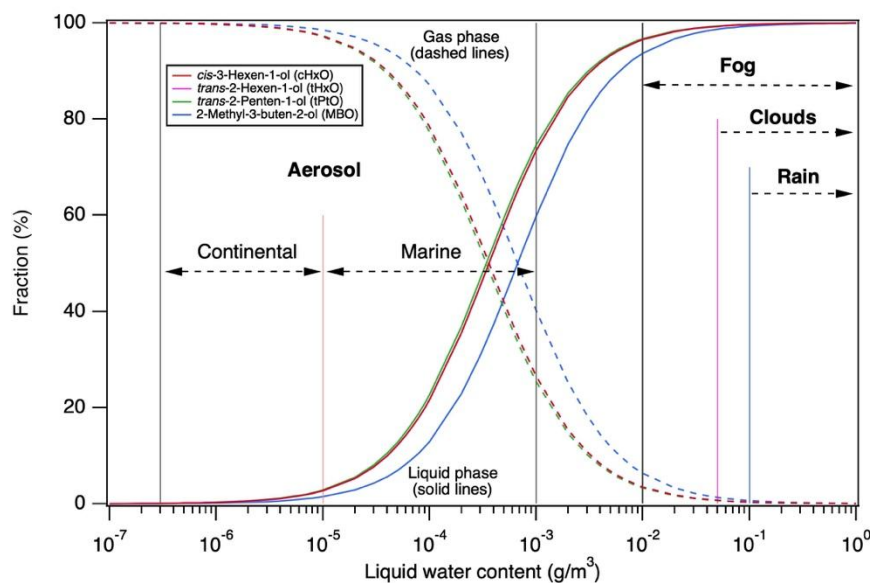

**Figure S1.** Calculated partitioning of the GLVs between the gas and aqueous phases as a function of liquid water content. The Henry's law solubility coefficients used for the calculation of cHxO, tHxO, tPtO, and MBO were  $113 \text{ M atm}^{-1}$ ,  $94 \text{ M atm}^{-1}$ ,  $120 \text{ M atm}^{-1}$ , and  $61 \text{ M atm}^{-1}$ , respectively (Sarang et al., 2021; Sander, 2023).

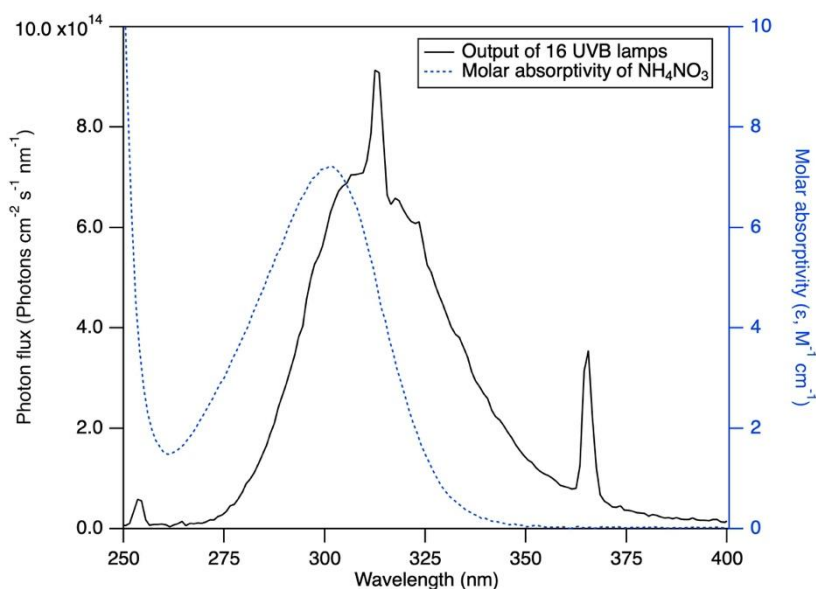

**Figure S2.** The photon flux of inside the photoreactor and the molar absorptivity ( $\epsilon$ ) of  $\text{NH}_4\text{NO}_3$ .

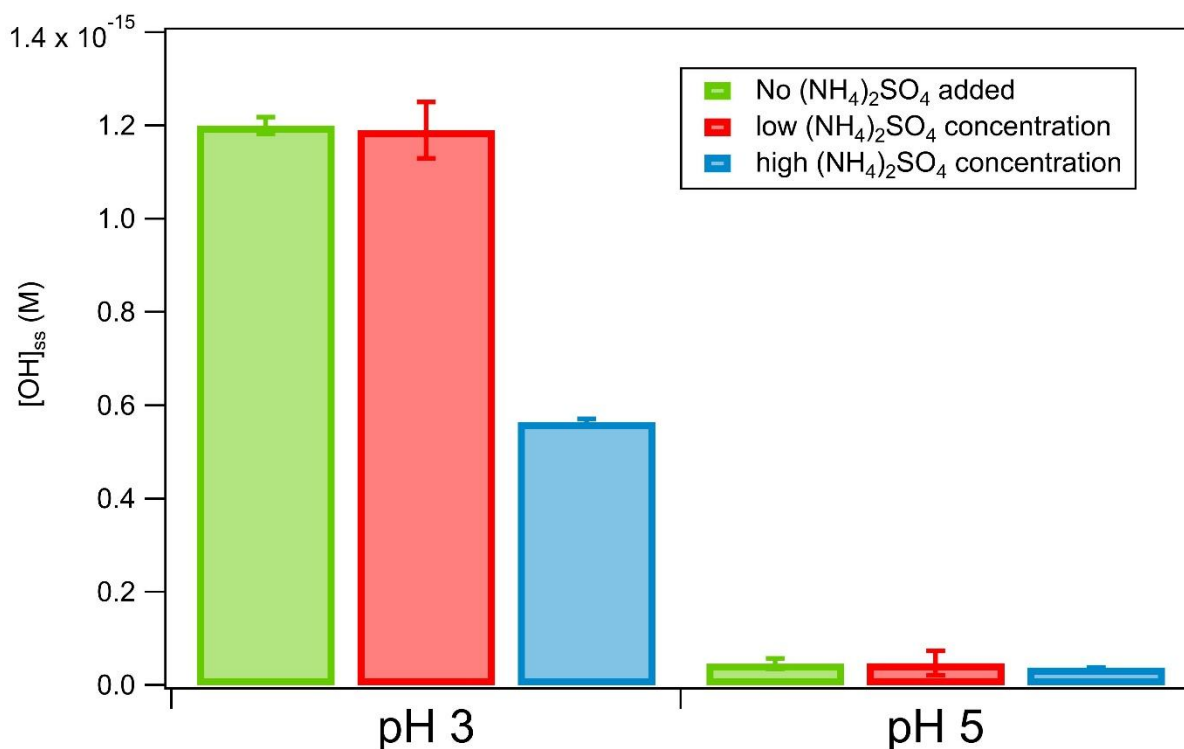

**Figure S3.** Estimated  $[\cdot\text{OH}]_{ss}$  in nitrate-mediated photooxidation experiments under dilute cloud/fog-like conditions. These values were obtained from a separate set of experiments (i.e., GLVs were not present in the solutions) using benzoic acid (10  $\mu\text{M}$ ) as the  $\cdot\text{OH}$  probe compound and measuring the formation of p-hydroxybenzoic acid from the reaction of  $\cdot\text{OH}$  with BA (Lyu et al., 2023; Yang et al., 2021; Yang et al., 2023). The error bars represent one standard deviation originating from multiple experiments and measurements. For the low  $(\text{NH}_4)_2\text{SO}_4$  concentration conditions (red bars), 0.135 mM and 0.583 mM of  $(\text{NH}_4)_2\text{SO}_4$  was added into the solutions for pH 3 and 5, respectively (Table 1). For the high  $(\text{NH}_4)_2\text{SO}_4$  concentration conditions (blue bars), 6.135 mM and 6.580 mM of  $(\text{NH}_4)_2\text{SO}_4$  was added into the solutions for pH 3 and 5, respectively (Table 1).

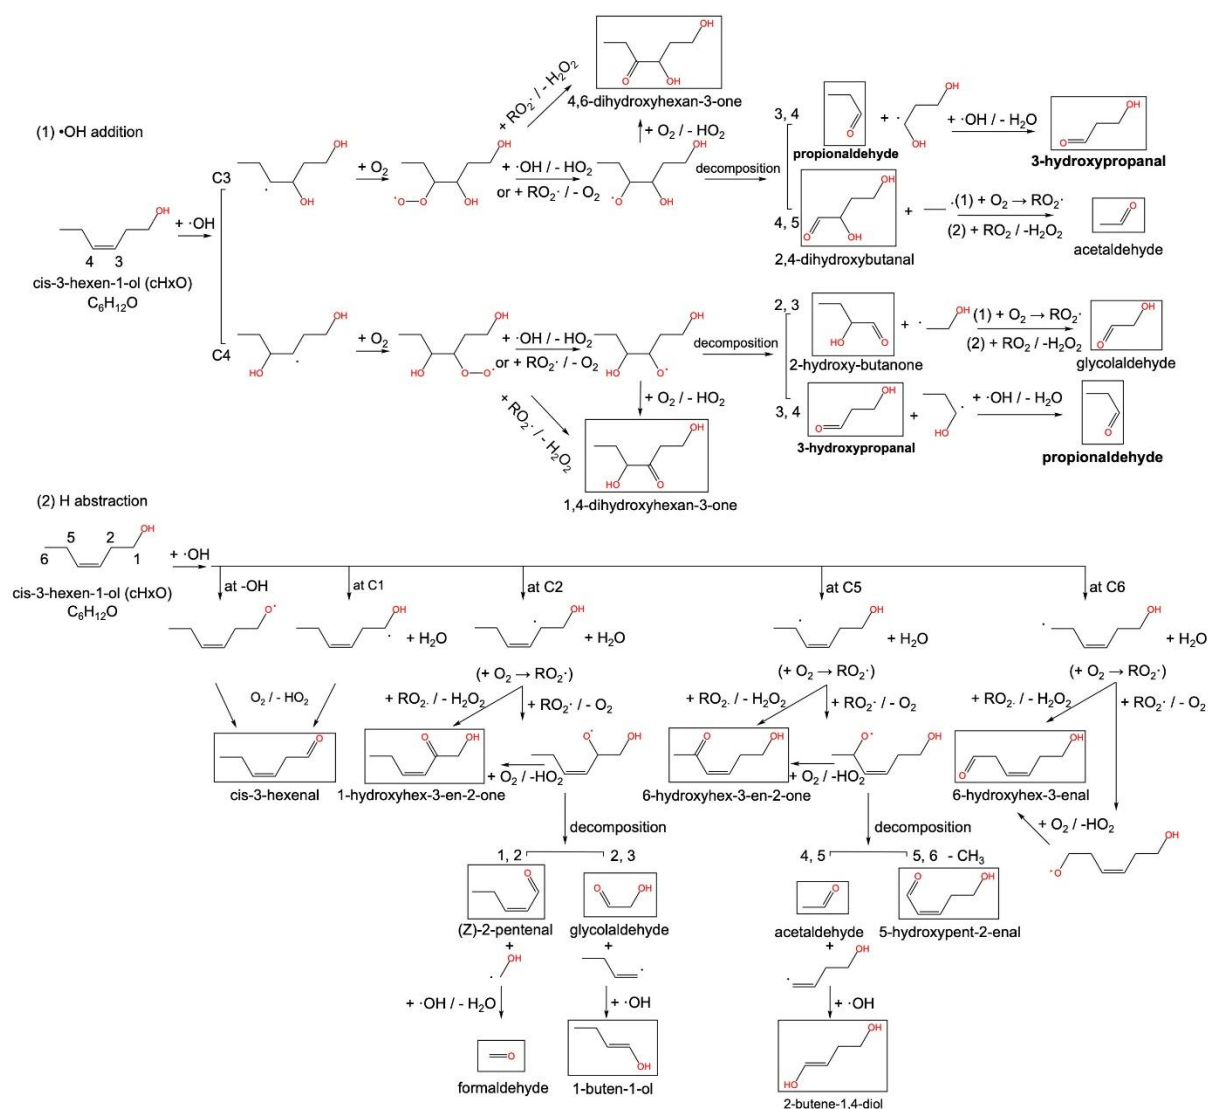

78

79 **Figure S4.** The proposed reaction mechanism and first-generation products via (1)  $\cdot\text{OH}$   
 80 addition, and (2) H abstraction for the oxidation cHxO by  $\cdot\text{OH}$  in the aqueous phase based on  
 81 the existing literature (Reisen et al., 2003; Sarang et al., 2023). Similar reaction mechanisms  
 82 are expected for the  $\cdot\text{OH}$  oxidation of tHxO and tPtO given their similar molecular structures.  
 83 The expected products are shown in boxes, while expected key products are highlighted in  
 84 boldface. Note that  $\cdot\text{OH}$  can also react with organic compounds through electron transfer  
 85 pathways, which are not included here due to their expected minor roles in oxidation with  
 86 GLVs. Bimolecular combination reaction pathways involving  $\text{RO}_2\cdot$  and  $\text{RO}\cdot$  (e.g.,  $\text{RO}_2\cdot +$   
 87  $\text{RO}_2\cdot$ ) that lead to oligomer formation are also not known here.

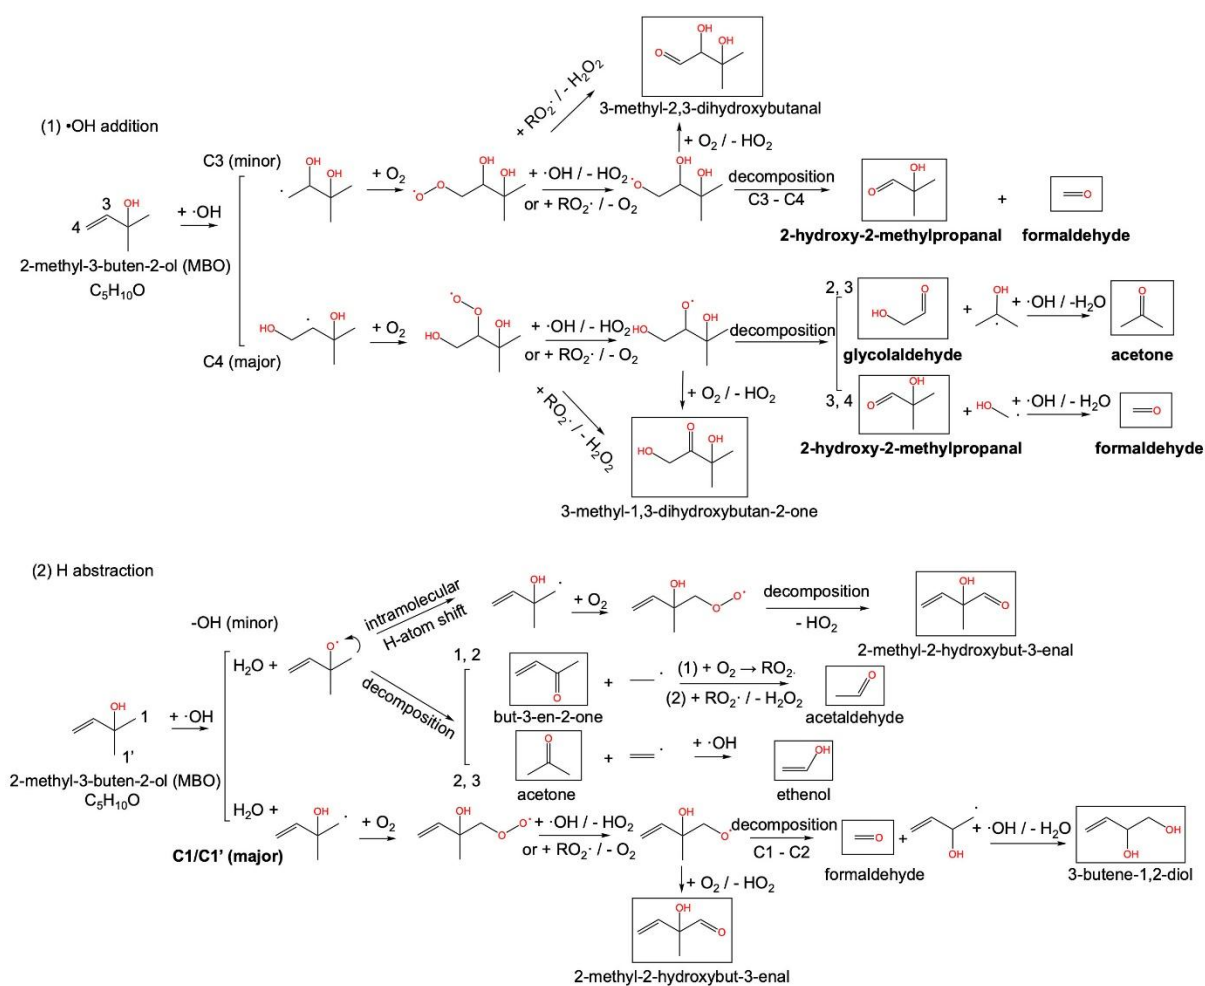

88

89 **Figure S5.** The proposed reaction mechanism and first generation products via (1)  $\cdot\text{OH}$   
 90 addition and (2) H abstraction for the oxidation MBO by  $\cdot\text{OH}$  in the aqueous phase based on  
 91 the existing literature (Atkinson and Arey, 2003; Carrasco et al., 2007; Chan et al., 2009;  
 92 Reisen et al., 2003; Sarang et al., 2023). The expected products are shown in boxes, while  
 93 expected key products are highlighted in boldface. Note that  $\cdot\text{OH}$  can also react with MBO  
 94 through electron transfer pathways, which are not included here due to their expected minor  
 95 roles in oxidation with GLVs. Bimolecular combination reaction pathways involving  $\text{RO}_2\cdot$  and  
 96  $\text{RO}\cdot$  (e.g.,  $\text{RO}_2\cdot + \text{RO}_2\cdot$ ) that lead to oligomer formation are also not known here.

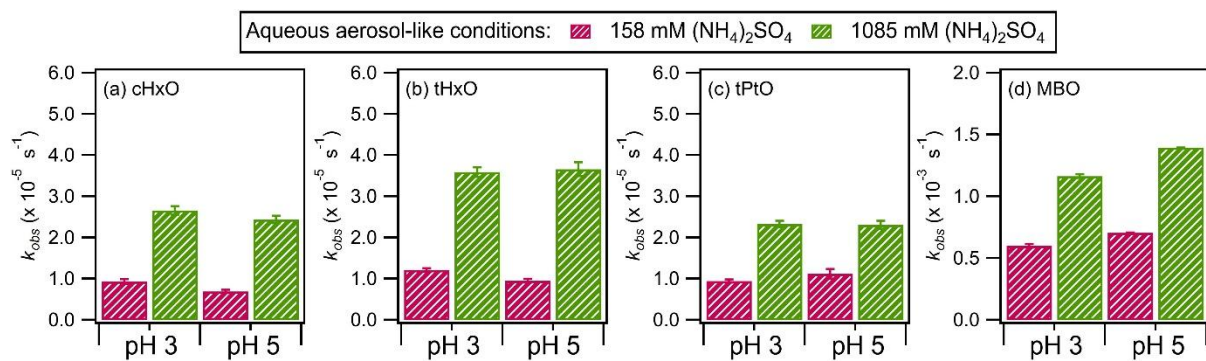

**Figure S6.** The  $k_{obs}$  values for the decays of the four GLVs upon irradiation when only sulfate (in the form of  $(\text{NH}_4)_2\text{SO}_4$  and (for pH 3)  $\text{H}_2\text{SO}_4$ ) was present in the solutions. The error bars represent one standard deviation originating from triplicate experiments and measurements.

**Table S1.** List of reactions pathways initiated by the aqueous photolysis of nitrate compiled from the literature (Gligorovski et al., 2015; Herrmann, 2007; Mack and Bolton, 1999; Marussi and Vione, 2021; Scharcko et al., 2014).

| No. | Reactions                                                                                                   | Quantum yield ( $\Phi$ )/<br>Acid dissociation constant ( $pK_a$ ) |
|-----|-------------------------------------------------------------------------------------------------------------|--------------------------------------------------------------------|
| 1   | $\text{NO}_3^- + h\nu \rightarrow [\text{NO}_2\bullet + \text{O}\bullet^-]_{\text{cage}}$                   | $\Phi = 0.01$                                                      |
| 2   | $[\text{NO}_2\bullet + \text{O}\bullet^-]_{\text{cage}} \rightarrow \text{NO}_2\bullet + \text{O}\bullet^-$ | —                                                                  |
| 3   | $\text{O}\bullet^- + \text{H}_2\text{O} \rightleftharpoons \bullet\text{OH} + \text{OH}^-$                  | $pK_a(\bullet\text{OH}) = 11.9$                                    |
| 4   | $[\text{NO}_2\bullet + \text{O}\bullet^-]_{\text{cage}} \rightarrow \text{OONO}^-$                          | —                                                                  |
| 5   | $\text{OONO}^- + \text{H}^+ \rightleftharpoons \text{HOONO}$                                                | $pK_a = 7$                                                         |
| 6   | $\text{HOONO} \rightarrow \bullet\text{OH} + \text{NO}_2\bullet$                                            | —                                                                  |
| 7   | $2\text{NO}_2\bullet \rightleftharpoons \text{N}_2\text{O}_4$                                               | —                                                                  |
| 8   | $\text{N}_2\text{O}_4 + \text{H}_2\text{O} \rightarrow \text{HNO}_2 + \text{NO}_3^- + \text{H}^+$           | —                                                                  |
| 9   | $\text{HNO}_2 \rightleftharpoons \text{H}^+ + \text{NO}_2^-$                                                | $pK_a = \sim 3.3$                                                  |
| 10  | $\text{NO}_2^- + h\nu \rightarrow \text{NO}\bullet + \text{O}\bullet^-$                                     | $\Phi = 0.025\text{--}0.065$                                       |
| 11  | $\text{NO}_2^- + h\nu \rightarrow \text{NO}_2\bullet + \text{e}^-$                                          | $\Phi = \sim 0.001$                                                |
| 12  | $\text{NO}_2^- + \bullet\text{OH} \rightarrow \text{NO}_2\bullet + \text{OH}^-$                             | —                                                                  |
| 13  | $\text{NO}\bullet + \text{NO}_2\bullet \rightleftharpoons \text{N}_2\text{O}_3$                             | —                                                                  |
| 14  | $\text{N}_2\text{O}_3 + \text{H}_2\text{O} \rightarrow 2 \text{NO}_2^- + 2 \text{H}^+$                      | —                                                                  |
| 15  | $\text{HNO}_2 + h\nu \rightarrow \text{NO}\bullet + \bullet\text{OH}$                                       | $\Phi = 0.35$                                                      |
| 16  | $\text{HNO}_2 + \bullet\text{OH} \rightarrow \text{NO}_2\bullet + \text{H}_2\text{O}$                       | —                                                                  |
| 17  | $2 \text{HNO}_2 \rightarrow \text{NO}\bullet + \text{NO}_2\bullet + \text{H}_2\text{O}$                     | —                                                                  |

**Table S2.** Statistical analyses (student's  $t$  test) for the differences in  $k_{obs}$  at different pH and ionic strengths under cloud/fog-like conditions for cHxO (Figure 2 in the main text).

| cHxO                  | pH 3                  | pH 3                 | pH 5                  | pH 5                 |
|-----------------------|-----------------------|----------------------|-----------------------|----------------------|
|                       | $I_{total} = 0.002$ M | $I_{total} = 0.02$ M | $I_{total} = 0.002$ M | $I_{total} = 0.02$ M |
| pH 3                  |                       |                      |                       |                      |
| $I_{total} = 0.002$ M | /                     | N.S.S.               | $p < 0.05$            | N.S.S.               |
| pH 3                  |                       |                      |                       |                      |
| $I_{total} = 0.02$ M  | N.S.S.                | /                    | N.S.S.                | N.S.S.               |
| pH 5                  |                       |                      |                       |                      |
| $I_{total} = 0.002$ M | $p < 0.05$            | N.S.S.               | /                     | N.S.S.               |
| pH 5                  |                       |                      |                       |                      |
| $I_{total} = 0.02$ M  | N.S.S.                | N.S.S.               | N.S.S.                | /                    |

Note: If the  $p$  value is smaller than 0.05, this indicates that the difference between the two variables in the student's  $t$  test is statistically significant. Conversely, if the  $p$  value is larger than 0.05, this indicates that the difference is not statically significant (N.S.S.).

**Table S3.** Statistical analyses (student's  $t$  test) for the differences in  $k_{obs}$  at different pH and ionic strengths under cloud/fog-like conditions for tHxO (Figure 2 in the main text).

| tHxO                  | pH 3                  | pH 3                 | pH 5                  | pH 5                 |
|-----------------------|-----------------------|----------------------|-----------------------|----------------------|
|                       | $I_{total} = 0.002$ M | $I_{total} = 0.02$ M | $I_{total} = 0.002$ M | $I_{total} = 0.02$ M |
| pH 3                  | /                     | N.S.S.               | $p < 0.05$            | $p < 0.05$           |
| $I_{total} = 0.002$ M |                       |                      |                       |                      |
| pH 3                  | N.S.S.                | /                    | $p < 0.05$            | $p < 0.05$           |
| $I_{total} = 0.02$ M  |                       |                      |                       |                      |
| pH 5                  | $p < 0.05$            | $p < 0.05$           | /                     | N.S.S.               |
| $I_{total} = 0.002$ M |                       |                      |                       |                      |
| pH 5                  | $p < 0.05$            | $p < 0.05$           | N.S.S.                | /                    |
| $I_{total} = 0.02$ M  |                       |                      |                       |                      |

Note: If the  $p$  value is smaller than 0.05, this indicates that the difference between the two variables in the student's  $t$  test is statistically significant. Conversely, if the  $p$  value is larger than 0.05, this indicates that the difference is not statically significant (N.S.S.).

**Table S4.** Statistical analyses (student's  $t$  test) for the differences in  $k_{obs}$  at different pH and ionic strengths under cloud/fog-like conditions for tPtO (Figure 2 in the main text).

| tPtO                  | pH 3                  | pH 3                 | pH 5                  | pH 5                 |
|-----------------------|-----------------------|----------------------|-----------------------|----------------------|
|                       | $I_{total} = 0.002$ M | $I_{total} = 0.02$ M | $I_{total} = 0.002$ M | $I_{total} = 0.02$ M |
| pH 3                  |                       |                      |                       |                      |
| $I_{total} = 0.002$ M | /                     | N.S.S.               | $p < 0.05$            | $p < 0.05$           |
| pH 3                  |                       |                      |                       |                      |
| $I_{total} = 0.02$ M  | N.S.S.                | /                    | $p < 0.05$            | $p < 0.05$           |
| pH 5                  |                       |                      |                       |                      |
| $I_{total} = 0.002$ M | $p < 0.05$            | $p < 0.05$           | /                     | N.S.S.               |
| pH 5                  |                       |                      |                       |                      |
| $I_{total} = 0.02$ M  | $p < 0.05$            | $p < 0.05$           | N.S.S.                | /                    |

Note: If the  $p$  value is smaller than 0.05, this indicates that the difference between the two variables in the student's  $t$  test is statistically significant. Conversely, if the  $p$  value is larger than 0.05, this indicates that the difference is not statically significant (N.S.S.).

**Table S5.** Statistical analyses (student's  $t$  test) for the differences in  $k_{obs}$  at different pH and ionic strengths under cloud/fog-like conditions for MBO (Figure 2 in the main text).

| MBO                   | pH 3                  | pH 3                 | pH 5                  | pH 5                 |
|-----------------------|-----------------------|----------------------|-----------------------|----------------------|
|                       | $I_{total} = 0.002$ M | $I_{total} = 0.02$ M | $I_{total} = 0.002$ M | $I_{total} = 0.02$ M |
| pH 3                  | /                     | N.S.S.               | $p < 0.05$            | $p < 0.05$           |
| $I_{total} = 0.002$ M |                       |                      |                       |                      |
| pH 3                  | N.S.S.                | /                    | $p < 0.05$            | $p < 0.05$           |
| $I_{total} = 0.02$ M  |                       |                      |                       |                      |
| pH 5                  | $p < 0.05$            | $p < 0.05$           | /                     | N.S.S.               |
| $I_{total} = 0.002$ M |                       |                      |                       |                      |
| pH 5                  | $p < 0.05$            | $p < 0.05$           | N.S.S.                | /                    |
| $I_{total} = 0.02$ M  |                       |                      |                       |                      |

Note: If the  $p$  value is smaller than 0.05, this indicates that the difference between the two variables in the student's  $t$  test is statistically significant. Conversely, if the  $p$  value is larger than 0.05, this indicates that the difference is not statically significant (N.S.S.).

**Table S6.** Statistical analyses (student's  $t$  test) for the differences in  $Y_{SOA}$  between pH and ionic strength under cloud/fog-like conditions for cHxO (Figure 3 in the main text).

| cHxO                  | pH 3                  | pH 3                 | pH 5                  | pH 5                 |
|-----------------------|-----------------------|----------------------|-----------------------|----------------------|
|                       | $I_{total} = 0.002$ M | $I_{total} = 0.02$ M | $I_{total} = 0.002$ M | $I_{total} = 0.02$ M |
| pH 3                  | /                     | N.S.S.               | $p < 0.05$            | $p < 0.05$           |
| $I_{total} = 0.002$ M |                       |                      |                       |                      |
| pH 3                  | N.S.S.                | /                    | $p < 0.05$            | $p < 0.05$           |
| $I_{total} = 0.02$ M  |                       |                      |                       |                      |
| pH 5                  | $p < 0.05$            | $p < 0.05$           | /                     | $p < 0.05$           |
| $I_{total} = 0.002$ M |                       |                      |                       |                      |
| pH 5                  | $p < 0.05$            | $p < 0.05$           | $p < 0.05$            | /                    |
| $I_{total} = 0.02$ M  |                       |                      |                       |                      |

Note: If the  $p$  value is smaller than 0.05, this indicates that the difference between the two variables in the student's  $t$  test is statistically significant. Conversely, if the  $p$  value is larger than 0.05, this indicates that the difference is not statically significant (N.S.S.).

**Table S7.** Statistical analyses (student's  $t$  test) for the differences in  $Y_{SOA}$  between pH and ionic strength under cloud/fog-like conditions for tHxO (Figure 3 in the main text).

| tHxO                  | pH 3                  | pH 3                 | pH 5                  | pH 5                 |
|-----------------------|-----------------------|----------------------|-----------------------|----------------------|
|                       | $I_{total} = 0.002$ M | $I_{total} = 0.02$ M | $I_{total} = 0.002$ M | $I_{total} = 0.02$ M |
| pH 3                  | /                     | $p < 0.05$           | N.S.S.                | $p < 0.05$           |
| $I_{total} = 0.002$ M |                       |                      |                       |                      |
| pH 3                  | $p < 0.05$            | /                    | N.S.S.                | N.S.S.               |
| $I_{total} = 0.02$ M  |                       |                      |                       |                      |
| pH 5                  | N.S.S.                | N.S.S.               | /                     | N.S.S.               |
| $I_{total} = 0.002$ M |                       |                      |                       |                      |
| pH 5                  | $p < 0.05$            | N.S.S.               | N.S.S.                | /                    |
| $I_{total} = 0.02$ M  |                       |                      |                       |                      |

Note: If the  $p$  value is smaller than 0.05, this indicates that the difference between the two variables in the student's  $t$  test is statistically significant. Conversely, if the  $p$  value is larger than 0.05, this indicates that the difference is not statically significant (N.S.S.).

**Table S8.** Statistical analyses (student's  $t$  test) for the differences in  $Y_{SOA}$  between pH and ionic strength under cloud/fog-like conditions for tPtO (Figure 3 in the main text).

| tPtO                  | pH 3                  | pH 3                 | pH 5                  | pH 5                 |
|-----------------------|-----------------------|----------------------|-----------------------|----------------------|
|                       | $I_{total} = 0.002$ M | $I_{total} = 0.02$ M | $I_{total} = 0.002$ M | $I_{total} = 0.02$ M |
| pH 3                  | /                     | N.S.S.               | N.S.S.                | $p < 0.05$           |
| $I_{total} = 0.002$ M |                       |                      |                       |                      |
| pH 3                  | N.S.S.                | /                    | N.S.S.                | $p < 0.05$           |
| $I_{total} = 0.02$ M  |                       |                      |                       |                      |
| pH 5                  | N.S.S.                | N.S.S.               | /                     | $p < 0.05$           |
| $I_{total} = 0.002$ M |                       |                      |                       |                      |
| pH 5                  | $p < 0.05$            | $p < 0.05$           | $p < 0.05$            | /                    |
| $I_{total} = 0.02$ M  |                       |                      |                       |                      |

Note: If the  $p$  value is smaller than 0.05, this indicates that the difference between the two variables in the student's  $t$  test is statistically significant. Conversely, if the  $p$  value is larger than 0.05, this indicates that the difference is not statically significant (N.S.S.).

**Table S9.** Statistical analyses (student's  $t$  test) for the differences in  $Y_{SOA}$  between pH and ionic strength under cloud/fog-like conditions for MBO (Figure 3 in the main text).

| MBO                           | pH 3                          | pH 3                         | pH 5                          | pH 5                         |
|-------------------------------|-------------------------------|------------------------------|-------------------------------|------------------------------|
|                               | $I_{total} = 0.002 \text{ M}$ | $I_{total} = 0.02 \text{ M}$ | $I_{total} = 0.002 \text{ M}$ | $I_{total} = 0.02 \text{ M}$ |
| pH 3                          | /                             | N.S.S.                       | N.S.S.                        | N.S.S.                       |
| $I_{total} = 0.002 \text{ M}$ |                               |                              |                               |                              |
| pH 3                          | N.S.S.                        | /                            | N.S.S.                        | N.S.S.                       |
| $I_{total} = 0.02 \text{ M}$  |                               |                              |                               |                              |
| pH 5                          | N.S.S.                        | N.S.S.                       | /                             | N.S.S.                       |
| $I_{total} = 0.002 \text{ M}$ |                               |                              |                               |                              |
| pH 5                          | N.S.S.                        | N.S.S.                       | N.S.S.                        | /                            |
| $I_{total} = 0.02 \text{ M}$  |                               |                              |                               |                              |

Note: If the  $p$  value is smaller than 0.05, this indicates that the difference between the two variables in the student's  $t$  test is statistically significant. Conversely, if the  $p$  value is larger than 0.05, this indicates that the difference is not statically significant (N.S.S.).

**Table S10.** Statistical analyses (student's  $t$  test) for the differences in  $k_{obs}$  at different pH and ionic strengths under aqueous aerosol-like conditions for cHxO (Figure 4 in the main text).

| cHxO                        | pH 3                | pH 3                | pH 5                | pH 5                |
|-----------------------------|---------------------|---------------------|---------------------|---------------------|
|                             | $I_{total} = 0.5$ M | $I_{total} = 3.3$ M | $I_{total} = 0.5$ M | $I_{total} = 3.3$ M |
| pH 3<br>$I_{total} = 0.5$ M | /                   | $p < 0.05$          | N.S.S.              | $p < 0.05$          |
| pH 3<br>$I_{total} = 3.3$ M | $p < 0.05$          | /                   | $p < 0.05$          | N.S.S.              |
| pH 5<br>$I_{total} = 0.5$ M | N.S.S.              | $P < 0.05$          | /                   | $p < 0.05$          |
| pH 5<br>$I_{total} = 3.3$ M | $p < 0.05$          | N.S.S.              | $p < 0.05$          | /                   |

Note: If the  $p$  value is smaller than 0.05, this indicates that the difference between the two variables in the student's  $t$  test is statistically significant. Conversely, if the  $p$  value is larger than 0.05, this indicates that the difference is not statically significant (N.S.S.).

**Table S11.** Statistical analyses (student's  $t$  test) for the differences in  $k_{obs}$  at different pH and ionic strengths under aqueous aerosol-like conditions for tHxO (Figure 4 in the main text).

| tHxO                        | pH 3                | pH 3                | pH 5                | pH 5                |
|-----------------------------|---------------------|---------------------|---------------------|---------------------|
|                             | $I_{total} = 0.5$ M | $I_{total} = 3.3$ M | $I_{total} = 0.5$ M | $I_{total} = 3.3$ M |
| pH 3<br>$I_{total} = 0.5$ M | /                   | $p < 0.05$          | N.S.S.              | $p < 0.05$          |
| pH 3<br>$I_{total} = 3.3$ M | $p < 0.05$          | /                   | $p < 0.05$          | $p < 0.05$          |
| pH 5<br>$I_{total} = 0.5$ M | N.S.S.              | $p < 0.05$          | /                   | $p < 0.05$          |
| pH 5<br>$I_{total} = 3.3$ M | $p < 0.05$          | $p < 0.05$          | $p < 0.05$          | /                   |

Note: If the  $p$  value is smaller than 0.05, this indicates that the difference between the two variables in the student's  $t$  test is statistically significant. Conversely, if the  $p$  value is larger than 0.05, this indicates that the difference is not statically significant (N.S.S.).

**Table S12.** Statistical analyses (student's  $t$  test) for the differences in  $k_{obs}$  at different pH and ionic strengths under aqueous aerosol-like conditions for tPtO (Figure 4 in the main text).

| tPtO                                | pH 3                        | pH 3                        | pH 5                        | pH 5                        |
|-------------------------------------|-----------------------------|-----------------------------|-----------------------------|-----------------------------|
|                                     | $I_{total} = 0.5 \text{ M}$ | $I_{total} = 3.3 \text{ M}$ | $I_{total} = 0.5 \text{ M}$ | $I_{total} = 3.3 \text{ M}$ |
| pH 3<br>$I_{total} = 0.5 \text{ M}$ | /                           | $p < 0.05$                  | $p < 0.05$                  | $p < 0.05$                  |
| pH 3<br>$I_{total} = 3.3 \text{ M}$ | $p < 0.05$                  | /                           | $p < 0.05$                  | $p < 0.05$                  |
| pH 5<br>$I_{total} = 0.5 \text{ M}$ | $p < 0.05$                  | $p < 0.05$                  | /                           | $p < 0.05$                  |
| pH 5<br>$I_{total} = 3.3 \text{ M}$ | $p < 0.05$                  | $p < 0.05$                  | $p < 0.05$                  | /                           |

Note: If the  $p$  value is smaller than 0.05, this indicates that the difference between the two variables in the student's  $t$  test is statistically significant. Conversely, if the  $p$  value is larger than 0.05, this indicates that the difference is not statically significant (N.S.S.).

**Table S13.** Statistical analyses (student's  $t$  test) for the differences in  $k_{obs}$  at different pH and ionic strengths under aqueous aerosol-like conditions for MBO (Figure 4 in the main text).

| MBO                 | pH 3                | pH 3                | pH 5                | pH 5                |
|---------------------|---------------------|---------------------|---------------------|---------------------|
|                     | $I_{total} = 0.5$ M | $I_{total} = 3.3$ M | $I_{total} = 0.5$ M | $I_{total} = 3.3$ M |
| pH 3                | /                   | $p < 0.05$          | $p < 0.05$          | $p < 0.05$          |
| $I_{total} = 0.5$ M |                     |                     |                     |                     |
| pH 3                | $p < 0.05$          | /                   | $p < 0.05$          | $p < 0.05$          |
| $I_{total} = 3.3$ M |                     |                     |                     |                     |
| pH 5                | $p < 0.05$          | $p < 0.05$          | /                   | $p < 0.05$          |
| $I_{total} = 0.5$ M |                     |                     |                     |                     |
| pH 5                | $p < 0.05$          | $p < 0.05$          | $p < 0.05$          | /                   |
| $I_{total} = 3.3$ M |                     |                     |                     |                     |

Note: If the  $p$  value is smaller than 0.05, this indicates that the difference between the two variables in the student's  $t$  test is statistically significant. Conversely, if the  $p$  value is larger than 0.05, this indicates that the difference is not statically significant (N.S.S.).

**Table S14.** Statistical analyses (student's  $t$  test) for the differences in  $Y_{SOA}$  between pH and ionic strength under aqueous aerosol-like conditions for cHxO (Figure 5 in the main text).

| cHxO                        | pH 3                | pH 3                | pH 5                | pH 5                |
|-----------------------------|---------------------|---------------------|---------------------|---------------------|
|                             | $I_{total} = 0.5$ M | $I_{total} = 3.3$ M | $I_{total} = 0.5$ M | $I_{total} = 3.3$ M |
| pH 3<br>$I_{total} = 0.5$ M | /                   | $p < 0.05$          | N.S.S.              | $p < 0.05$          |
| pH 3<br>$I_{total} = 3.3$ M | $p < 0.05$          | /                   | $p < 0.05$          | $p < 0.05$          |
| pH 5<br>$I_{total} = 0.5$ M | N.S.S.              | $p < 0.05$          | /                   | $p < 0.05$          |
| pH 5<br>$I_{total} = 3.3$ M | $p < 0.05$          | $p < 0.05$          | $p < 0.05$          | /                   |

Note: If the  $p$  value is smaller than 0.05, this indicates that the difference between the two variables in the student's  $t$  test is statistically significant. Conversely, if the  $p$  value is larger than 0.05, this indicates that the difference is not statically significant (N.S.S.).

**Table S15.** Statistical analyses (student's  $t$  test) for the differences in  $Y_{SOA}$  between pH and ionic strength under Aqueous aerosol-like conditions for tHxO (Figure 5 in the main text).

| tHxO                                | pH 3                        | pH 3                        | pH 5                        | pH 5                        |
|-------------------------------------|-----------------------------|-----------------------------|-----------------------------|-----------------------------|
|                                     | $I_{total} = 0.5 \text{ M}$ | $I_{total} = 3.3 \text{ M}$ | $I_{total} = 0.5 \text{ M}$ | $I_{total} = 3.3 \text{ M}$ |
| pH 3<br>$I_{total} = 0.5 \text{ M}$ | /                           | $p < 0.05$                  | $p < 0.05$                  | $p < 0.05$                  |
| pH 3<br>$I_{total} = 3.3 \text{ M}$ | $p < 0.05$                  | /                           | $p < 0.05$                  | N.S.S.                      |
| pH 5<br>$I_{total} = 0.5 \text{ M}$ | $p < 0.05$                  | $P < 0.05$                  | /                           | $p < 0.05$                  |
| pH 5<br>$I_{total} = 3.3 \text{ M}$ | $p < 0.05$                  | N.S.S.                      | $p < 0.05$                  | /                           |

Note: If the  $p$  value is smaller than 0.05, this indicates that the difference between the two variables in the student's  $t$  test is statistically significant. Conversely, if the  $p$  value is larger than 0.05, this indicates that the difference is not statically significant (N.S.S.).

**Table S16.** Statistical analyses (student's  $t$  test) for the differences in  $Y_{SOA}$  between pH and ionic strength under Aqueous aerosol-like conditions for tPtO (Figure 5 in the main text).

| tPtO                                | pH 3                        | pH 3                        | pH 5                        | pH 5                        |
|-------------------------------------|-----------------------------|-----------------------------|-----------------------------|-----------------------------|
|                                     | $I_{total} = 0.5 \text{ M}$ | $I_{total} = 3.3 \text{ M}$ | $I_{total} = 0.5 \text{ M}$ | $I_{total} = 3.3 \text{ M}$ |
| pH 3<br>$I_{total} = 0.5 \text{ M}$ | /                           | $p < 0.05$                  | $p < 0.05$                  | $p < 0.05$                  |
| pH 3<br>$I_{total} = 3.3 \text{ M}$ | $p < 0.05$                  | /                           | $p < 0.05$                  | $p < 0.05$                  |
| pH 5<br>$I_{total} = 0.5 \text{ M}$ | $p < 0.05$                  | $p < 0.05$                  | /                           | $p < 0.05$                  |
| pH 5<br>$I_{total} = 3.3 \text{ M}$ | $p < 0.05$                  | $p < 0.05$                  | $p < 0.05$                  | /                           |

Note: If the  $p$  value is smaller than 0.05, this indicates that the difference between the two variables in the student's  $t$  test is statistically significant. Conversely, if the  $p$  value is larger than 0.05, this indicates that the difference is not statically significant (N.S.S.).

**Table S17.** Statistical analyses (student's  $t$  test) for the differences in  $Y_{SOA}$  between pH and ionic strength under Aqueous aerosol-like conditions for MBO (Figure 5 in the main text).

| MBO                                 | pH 3                        | pH 3                        | pH 5                        | pH 5                        |
|-------------------------------------|-----------------------------|-----------------------------|-----------------------------|-----------------------------|
|                                     | $I_{total} = 0.5 \text{ M}$ | $I_{total} = 3.3 \text{ M}$ | $I_{total} = 0.5 \text{ M}$ | $I_{total} = 3.3 \text{ M}$ |
| pH 3<br>$I_{total} = 0.5 \text{ M}$ | /                           | $p < 0.05$                  | N.S.S.                      | $p < 0.05$                  |
| pH 3<br>$I_{total} = 3.3 \text{ M}$ | $p < 0.05$                  | /                           | $p < 0.05$                  | N.S.S.                      |
| pH 5<br>$I_{total} = 0.5 \text{ M}$ | N.S.S.                      | $p < 0.05$                  | /                           | $p < 0.05$                  |
| pH 5<br>$I_{total} = 3.3 \text{ M}$ | $p < 0.05$                  | N.S.S.                      | $p < 0.05$                  | /                           |

Note: If the  $p$  value is smaller than 0.05, this indicates that the difference between the two variables in the student's  $t$  test is statistically significant. Conversely, if the  $p$  value is larger than 0.05, this indicates that the difference is not statically significant (N.S.S.).

## 186 **References**

- 187 Anastasio, C. and McGregor, K. G.: Chemistry of fog waters in California's Central Valley:  
188 1. In situ photoformation of hydroxyl radical and singlet molecular oxygen, *Atmos Environ*,  
189 35, 1079-1089, 10.1016/S1352-2310(00)00281-8, 2001.
- 190 Atkinson, R. and Arey, J.: Atmospheric degradation of volatile organic compounds, *Chem*  
191 *Rev*, 103, 4605-4638, 10.1021/cr0206420, 2003.
- 192 Carrasco, N., Doussin, J. F., O'Connor, M., Wenger, J. C., Picquet-Varrault, B., Durand-  
193 Jolibois, R., and Carlier, P.: Simulation chamber studies of the atmospheric oxidation of 2-  
194 methyl-3-buten-2-ol: Reaction with hydroxyl radicals and ozone under a variety of  
195 conditions, *J Atmos Chem*, 56, 33-55, 10.1007/s10874-006-9041-y, 2007.
- 196 Chan, A. W. H., Galloway, M. M., Kwan, A. J., Chhabra, P. S., Keutsch, F. N., Wennberg, P.  
197 O., Flagan, R. C., and Seinfeld, J. H.: Photooxidation of 2-Methyl-3-Buten-2-ol (MBO) as a  
198 Potential Source of Secondary Organic Aerosol, *Environ Sci Technol*, 43, 4647-4652,  
199 10.1021/es802560w, 2009.
- 200 Gligorovski, S., Strekowski, R., Barbati, S., and Vione, D.: Environmental Implications of  
201 Hydroxyl Radicals (center dot OH), *Chemical Reviews*, 115, 13051-13092,  
202 10.1021/cr500310b, 2015.
- 203 Herrmann, H.: On the photolysis of simple anions and neutral molecules as sources of  
204 O-/OH, SOx- and Cl in aqueous solution, *Physical Chemistry Chemical Physics*, 9, 3935-  
205 3964, 10.1039/B618565G, 2007.
- 206 Herrmann, H., Hoffmann, D., Schaefer, T., Bräuer, P., and Tilgner, A.: Tropospheric  
207 Aqueous-Phase Free-Radical Chemistry: Radical Sources, Spectra, Reaction Kinetics and  
208 Prediction Tools, *Chemphyschem*, 11, 3796-3822, 10.1002/cphc.201000533, 2010.
- 209 Lyu, Y., Chow, J. T. C., and Nah, T.: Kinetics of the nitrate-mediated photooxidation of  
210 monocarboxylic acids in the aqueous phase, *Environ Sci-Proc Imp*, 25, 461-471,  
211 10.1039/d2em00458e, 2023.
- 212 Mack, J. and Bolton, J. R.: Photochemistry of nitrite and nitrate in aqueous solution: a  
213 review, *J Photoch Photobio A*, 128, 1-13, Doi 10.1016/S1010-6030(99)00155-0, 1999.
- 214 Marussi, G. and Vione, D.: Secondary Formation of Aromatic Nitroderivatives of  
215 Environmental Concern: Photonitration Processes Triggered by the Photolysis of Nitrate and  
216 Nitrite Ions in Aqueous Solution, *Molecules*, 26, 2550, 2021.
- 217 Reisen, F., Aschmann, S. M., Atkinson, R., and Arey, J.: Hydroxyaldehyde products from  
218 hydroxyl radical reactions of  
219 -3-hexen-1-ol and 2-methyl-3-buten-2-ol quantified by SPME and API-MS, *Environ Sci*  
220 *Technol*, 37, 4664-4671, 10.1021/es034142f, 2003.

- 221 Sander, R.: Compilation of Henry's law constants (version 5.0.0) for water as solvent, Atmos  
222 Chem Phys, 23, 10901-12440, 10.5194/acp-23-10901-2023, 2023.
- 223 Sarang, K., Otto, T., Rudzinski, K., Schaefer, T., Grgic, I., Nestorowicz, K., Herrmann, H.,  
224 and Szmigielski, R.: Reaction Kinetics of Green Leaf Volatiles with Sulfate, Hydroxyl, and  
225 Nitrate Radicals in Tropospheric Aqueous Phase, Environ Sci Technol, 55, 13666-13676,  
226 10.1021/acs.est.1c03276, 2021.
- 227 Sarang, K., Otto, T., Gagan, S., Rudzinski, K., Schaefer, T., Brüggemann, M., Grgic, I.,  
228 Kubas, A., Herrmann, H., and Szmigielski, R.: Aqueous-phase photo-oxidation of selected  
229 green leaf volatiles initiated by OH radicals: Products and atmospheric implications, Sci  
230 Total Environ, 879, 10.1016/j.scitotenv.2023.162622, 2023.
- 231 Scharko, N. K., Berke, A. E., and Raff, J. D.: Release of nitrous acid and nitrogen dioxide  
232 from nitrate photolysis in acidic aqueous solutions, Environ Sci Technol, 48, 11991-12001,  
233 10.1021/es503088x, 2014.
- 234 Yang, J., Au, W. C., Law, H., Lam, C. H., and Nah, T.: Formation and evolution of brown  
235 carbon during aqueous-phase nitrate-mediated photooxidation of guaiacol and 5-  
236 nitroguaiacol, Atmos Environ, 254, 118401, 10.1016/j.atmosenv.2021.118401, 2021.
- 237 Yang, J., Au, W. C., Law, H., Leung, C. H., Lam, C. H., and Nah, T.: pH affects the aqueous-  
238 phase nitrate-mediated photooxidation of phenolic compounds: implications for brown  
239 carbon formation and evolution, Environ Sci Process Impacts, 25, 176-189,  
240 10.1039/d2em00004k, 2023.
- 241
