# Supplementary material for: Roles of pH, ionic strength, and sulfate in the aqueous nitrate-mediated photooxidation of green leaf volatiles
Source: Copernicus journal article supplement (doi:10.5194/egusphere-2025-570), 2025-03-04
Supplement: Supplementary file [file egusphere-2025-570-AC2-supplement.pdf]

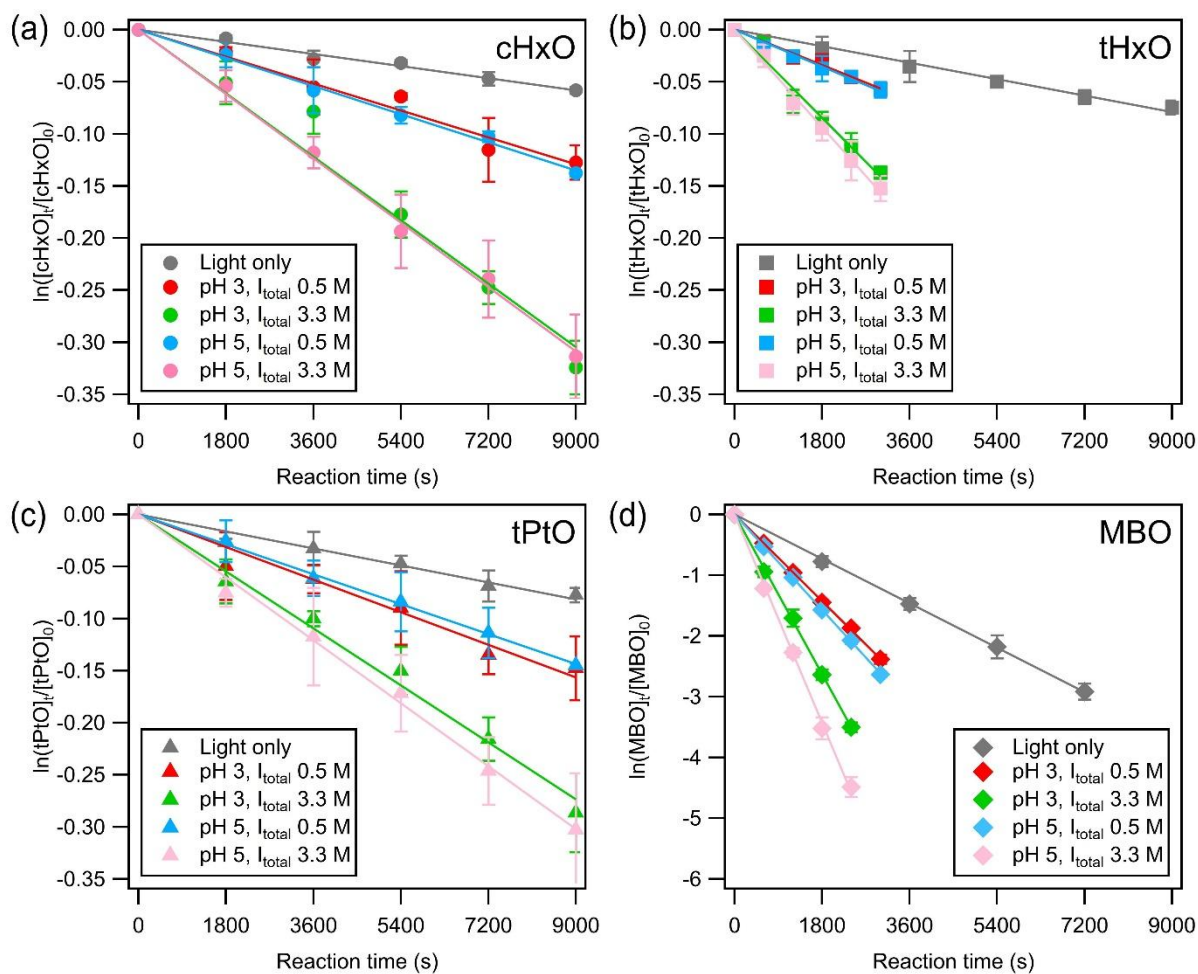

**Figure S4.** Decays of the GLVs in the absence (“Light only”) and presence of nitrate and sulfate under aqueous aerosol-like conditions (Table 1). The error bars represent one standard deviation originating from triplicate experiments and triplicate measurements at each reaction time. The  $k_{obs}$  at different pH and ionic strengths were corrected for the four GLVs under aqueous aerosol-like conditions.
